# Supplementary material
Source: PubMed Central journal article supplement (PMC3557077)
Supplement: 1219969110_pnas.201219969SI.pdf [file 1219969110_pnas.201219969SI.pdf]

# Supporting Information

Rodriguez et al. 10.1073/pnas.1219969110

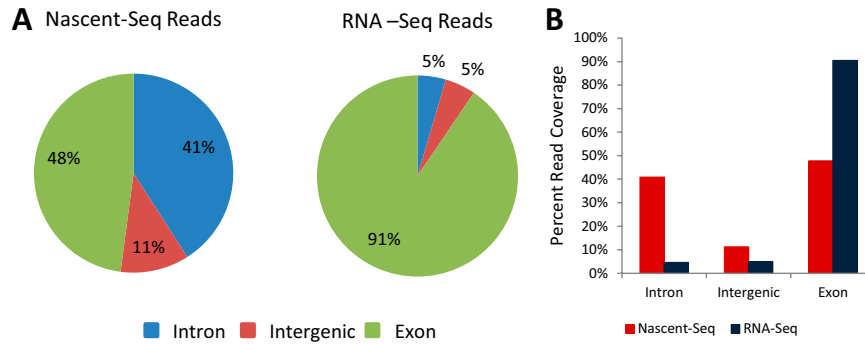

**Fig. S1.** Nascent-Seq enriches for intron signal. Nascent-Seq enriches for intron signal by ninefold compared with RNA-Seq. (A) Forty-one percent of Nascent-Seq reads fall within introns, whereas fewer than 5% of RNA-Seq reads fall within introns. Percent read coverage per base pair within introns and exons is plotted. (B) Percent read coverage in intron, intergenic, and exon regions plotted as a bar graph.

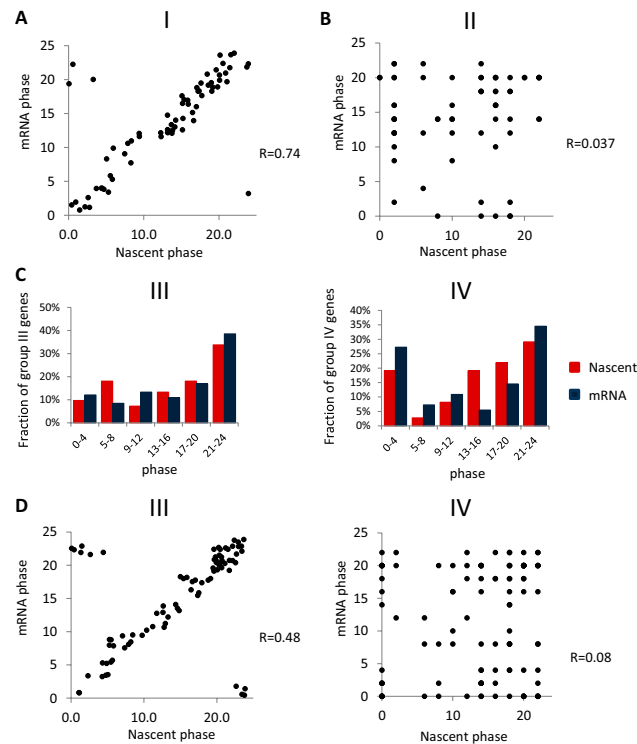

**Fig. S2.** Nascent vs. mRNA phase distributions for all cycling groups. (A) Individual group I phase distributions are highly correlated. Phases determined by Fourier analysis are plotted. (B) Individual group II phase distributions are poorly correlated. Phases were determined by assigning the time point with the average maximum reads per base pair for the Nascent-Seq and RNA-Seq datasets, respectively. (C) Group III and group IV Nascent-Seq (red) and RNA-Seq (blue) phase distributions. Group III phases were determined by Fourier analysis. Group IV phases of both datasets were set to the time point with the maximum average reads per base pair. (D) Individual group III phase distributions are highly correlated in contrast to individual group IV phase distributions, which are not correlated. Group III phases were determined by Fourier analysis. Group IV phases of both datasets were set to the time point with the maximum average reads per base pair.



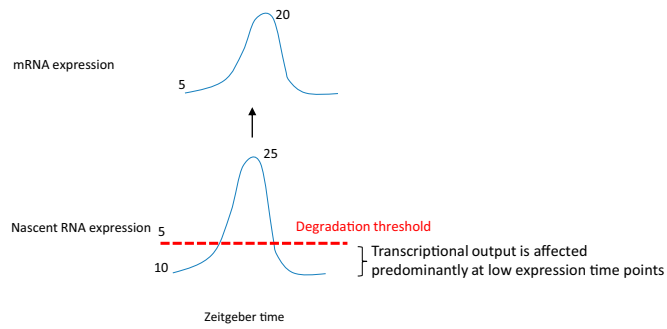

**Fig. 55.** Degradation threshold model. A constant degradation expression threshold could explain the higher mRNA than nascent cycling amplitudes without invoking a clock-controlled (temporally variable) posttranscriptional mechanism. The model posits that the trough values of cycling transcription are near this threshold, so degradation mechanisms can degrade their targets (e.g., within the nucleus) efficiently. After this threshold is substantially breached, a larger fraction of mRNA is stable, thereby creating a larger mRNA cycling amplitude than transcriptional amplitude. In the diagram, a constant degradation of five transcripts reduces the mRNA trough to 5 and the mRNA peak to 20, giving rise to a mRNA amplitude of 4 compared with a transcriptional amplitude of 2.5.



## Other Supporting Information Files

[Dataset S1 \(XLS\)](#)
